# Supplementary material
Source: ML conference proceedings conference paper supplement (https://proceedings.neurips.cc/paper_files/paper/2009/hash/c52f1bd66cc19d05628bd8bf27af3ad6-Abstract.html)
Supplement: Supplementary file 1 [file c52f1bd66cc19d05628bd8bf27af3ad6-Supplemental.zip]

---

# Computational Details of Linear Dyna Algorithms on Mountain-car

---

**Hengshuai Yao**  
Department of Computing Science  
University of Alberta  
Edmonton, AB, Canada T6G2E8

**Shalabh Bhatnagar**  
Department of Computer Science  
and Automation  
Indian Institute of Science  
Bangalore, India 560012

**Dongcui Diao**  
School of Economics and Management  
South China Normal University  
Guangzhou, China 518055

## Abstract

This supplementary material contains the computational details of linear Dyna algorithms on Mountain-car. The matrix  $F$  is very large and relatively dense, *e.g.*,  $30,000^2$  for state-action model. This leads to very slow online performance. We avoided the computation of  $F$ , and used a least-squares computation of projection.

## 1 Least-squares Computation of Projection

Gradient descent estimation of  $F$  and projecting directly using  $F$  lead to a very slow online performance because  $F$  is not sparse, although  $\Phi^T D P \Phi$  and  $\Phi^T D \Phi$  are both sparse. Notice that we only need  $F$  for projection operation. In our experiment of Dyna( $k$ )-lambda (and linear Dyna), we applied a least-squares computation of the projection, which makes use of Matlab backslash operator.

In particular, a projection  $L^{(k)}\tilde{\phi} = (\lambda\gamma)^{k-1}\gamma F_t\tilde{\phi}$  was computed by decomposing into

$$\begin{aligned} F_t\tilde{\phi} &= (\Phi^T P_t^T D_t \Phi)(\Phi^T D_t \Phi)^{-1}\tilde{\phi} \\ &= G_t \cdot (E_t^{-1}\tilde{\phi}), \end{aligned}$$

where  $G_t$  and  $E_t$  are very sparse, and updated every time step by

$$G_{t+1} = G_t + \vec{\phi}_{t+1}\phi_t^T,$$

and

$$E_{t+1} = E_t + \phi_t\phi_t^T.$$

First,  $E_t^{-1}\tilde{\phi}$  is computed by Matlab backslash operator, “ $E_t \setminus \tilde{\phi}$ ”, and then the result is left multiplied by  $G_t$ . Both operations can take advantage of the sparsity. For linear Dyna with state features, projection using  $F_a$  was also computed similarly. For linear Dyna,  $f$  is also computed by the backslash operation

$$f = E_t \setminus b_t,$$

where  $b$  is updated by

$$b_{t+1} = b_t + \phi_t r_t.$$

Further, we do not have to compute  $l^{(k)}$  explicitly because it is only used in generating the simulated reward:

$$\begin{aligned}\tilde{r}^{(k)} &= (l^{(k)})^T \tilde{\phi} \\ &= (f^{(\infty)} - (L^{(k)})^T f^{(\infty)})^T \tilde{\phi} \\ &= (f^{(\infty)})^T \tilde{\phi} - (f^{(\infty)})^T (L^{(k)} \tilde{\phi}),\end{aligned}$$

where  $(L^{(k)} \tilde{\phi})$  is already computed by the least-squares projection.  $(f^{(\infty)})$  is also computed by backslash operation using the LSTD rule.)

The two tricks make projection much more efficient, and greatly reduce CPU time per time step of Dyna algorithms.

All  $E$  matrices were initialized to  $I$ , and all  $G$  matrices were initialized to 0 for linear Dyna algorithms in Mountain-car.
